# Supplementary material for: In vitro anti-inflammatory, in silico molecular docking and molecular dynamics simulation of oleanane-type triterpenes from aerial parts of Mussaenda recurvata
Source: Royal Society of Chemistry journal article supplement (doi:10.1039/d2ra06870b), 2023-01-01
Supplement: d2ra06870b1.pdf [file d2ra06870b1.pdf]

## ***Supporting information***

### ***In vitro* anti-inflammatory, *in silico* molecular docking model and molecular dynamic study of oleanane-type triterpenes from aerial parts of *Mussaenda recurvata***

Mai Dinh Tri<sup>1,2\*</sup>, Nguyen Tan Phat<sup>1,2</sup>, Phan Nhat Minh<sup>1,2</sup>, Mai Thanh Chi<sup>1,2</sup>, Bui Xuan Hao<sup>3</sup>, Tran Nguyen Minh An<sup>\*4</sup>, Mahboob Alam<sup>5</sup>, Nguyen Van Kieu<sup>6,7</sup>, Van-Son Dang<sup>1,8</sup>, Tran Thi Ngoc Mai<sup>9</sup>, Thuc-Huy Duong<sup>3\*</sup>

<sup>1</sup>Graduate University of Science and Technology, Vietnam Academy of Science and Technology, 18 Hoang Quoc Viet, Cau Giay, Ha noi, Vietnam

<sup>2</sup>Institute of Chemical Technology, Vietnam Academy of Science and Technology, 1A TL29 Street, Thanh Loc ward, District 12, Ho Chi Minh City, Vietnam

<sup>3</sup>Department of Chemistry, Ho Chi Minh City University of Education, 280 An Duong Vuong Street, District 5, 748342, Ho Chi Minh City, Vietnam

<sup>4</sup>Faculty of Chemical Engineering, Industrial University of Ho Chi Minh City, Ho Chi Minh City 71420, Vietnam

<sup>5</sup>Department of Safety Engineering, Dongguk University, 123 Dongdae-ro, Gyeongju-si 780714, Gyeongsangbuk-do, Republic of Korea

<sup>6</sup>Institute of Fundamental and Applied Sciences, Duy Tan University, Ho Chi Minh City, 700000, Vietnam

<sup>7</sup>Faculty of Natural Sciences, Duy Tan University, Da Nang, 550000, Vietnam

<sup>8</sup>Institute of Tropical Biology, Vietnam Academy of Science and Technology, 85 Tran Quoc Toan Street, District 3, Ho Chi Minh City, 700000, Vietnam

<sup>9</sup>Institute of Applied Sciences, HUTECH University, Ho Chi Minh City, Viet Nam, 475A Dien Bien phu Street, Ward 25, Binh Thanh District, Ho Chi Minh City, Vietnam.

[maidinhtri@gmail.com](mailto:maidinhtri@gmail.com)

[huydt@hcmue.edu.vn](mailto:huydt@hcmue.edu.vn)

[trannguyenminhan@iuh.edu.vn](mailto:trannguyenminhan@iuh.edu.vn)



**Table S2.** NMR data of related compounds

| No                       | Scutellaric acid (1C)       |                                 |                                 | Hederagenin (1D)               |                                                   |                             | Wilforol C (1A)                 |                             |                                 | 3 $\alpha$ , 24-dihydroxyolean-12-en-28-oic acid (1B) |                                 |                                 | 3 $\beta$ , 6 $\beta$ , 24-trihydroxyolean-12-en-28-oic acid (3A) |                                 |                 | Spathodic acid (2A) |                 |                | Ilexosapogenin A (3B) |                |                 | 3 $\beta$ , 6 $\beta$ , 23-trihydroxyolean-12-en-28-oic acid (3) |                 |                | 3 $\beta$ , 6 $\beta$ , 19 $\alpha$ , 23-tetrahydroxyolean-12-en-28-oic acid (4) |  |  |
|--------------------------|-----------------------------|---------------------------------|---------------------------------|--------------------------------|---------------------------------------------------|-----------------------------|---------------------------------|-----------------------------|---------------------------------|-------------------------------------------------------|---------------------------------|---------------------------------|-------------------------------------------------------------------|---------------------------------|-----------------|---------------------|-----------------|----------------|-----------------------|----------------|-----------------|------------------------------------------------------------------|-----------------|----------------|----------------------------------------------------------------------------------|--|--|
|                          | [1]                         | [2]                             | [3]                             | [4]                            | [5]                                               | [6]                         | [7]                             | [8]                         | [9]                             | [10]                                                  | [11]                            | [11]                            | [11]                                                              | [11]                            | [11]            |                     |                 |                |                       |                |                 |                                                                  |                 |                |                                                                                  |  |  |
|                          | DMSO- <i>d</i> <sub>6</sub> | Pyridine- <i>d</i> <sub>5</sub> | Pyridine- <i>d</i> <sub>5</sub> | Acetone- <i>d</i> <sub>6</sub> | DMSO- <i>d</i> <sub>6</sub><br>+CDCl <sub>3</sub> | DMSO- <i>d</i> <sub>6</sub> | Pyridine- <i>d</i> <sub>5</sub> | DMSO- <i>d</i> <sub>6</sub> | Pyridine- <i>d</i> <sub>5</sub> | Pyridine- <i>d</i> <sub>5</sub>                       | Pyridine- <i>d</i> <sub>5</sub> | Pyridine- <i>d</i> <sub>5</sub> | Pyridine- <i>d</i> <sub>5</sub>                                   | Pyridine- <i>d</i> <sub>5</sub> |                 |                     |                 |                |                       |                |                 |                                                                  |                 |                |                                                                                  |  |  |
|                          | <sup>1</sup> H              | <sup>1</sup> H                  | <sup>13</sup> C                 | <sup>1</sup> H                 | <sup>13</sup> C                                   | <sup>1</sup> H              | <sup>13</sup> C                 | <sup>1</sup> H              | <sup>13</sup> C                 | <sup>1</sup> H                                        | <sup>13</sup> C                 | <sup>1</sup> H                  | <sup>13</sup> C                                                   | <sup>1</sup> H                  | <sup>13</sup> C | <sup>1</sup> H      | <sup>13</sup> C | <sup>1</sup> H | <sup>13</sup> C       | <sup>1</sup> H | <sup>13</sup> C | <sup>1</sup> H                                                   | <sup>13</sup> C | <sup>1</sup> H | <sup>13</sup> C                                                                  |  |  |
| 3                        | 3.55                        | 4.23                            | 73.5                            | 3.94                           | 75.7                                              | 3.88                        | 76.5                            | 3.77                        | 68.8                            | 4.29                                                  | 72.6                            | 4.23                            | 78.4                                                              | 4.30                            | 73.3            | 4.31                | 73.3            | 4.04           | 73.3                  | 4.04           | 73.4            |                                                                  |                 |                |                                                                                  |  |  |
| 5                        |                             |                                 | 48.7                            |                                | 43.6                                              |                             | 43.7                            |                             |                                 |                                                       | 48.7                            |                                 | 48.7                                                              |                                 | 48.6            |                     | 48.4            |                | 49.3                  |                | 49.7            |                                                                  |                 |                |                                                                                  |  |  |
| 6                        |                             |                                 |                                 |                                |                                                   |                             |                                 |                             |                                 | 5.06                                                  | 66.9                            |                                 |                                                                   |                                 |                 |                     |                 | 4.85           | 67.5                  | 4.83           | 67.9            |                                                                  |                 |                |                                                                                  |  |  |
| 19                       |                             |                                 |                                 |                                |                                                   |                             |                                 |                             |                                 |                                                       |                                 | 80.1                            | 3.73                                                              | 81.2                            | 3.18            | 81.2                |                 | 4.85           | 67.5                  | 4.83           | 67.9            |                                                                  |                 |                |                                                                                  |  |  |
| CH <sub>2</sub> -OH      | 3.43<br>3.19                | 4.18<br>3.73                    | 67.8                            | 3.88<br>3.68                   | 71.3                                              | 3.55<br>3.44                | 71.3                            | 3.65<br>3.37                | 64.4                            | 4.41<br>4.05                                          | 66.4                            | 4.18<br>3.73                    | 63.0                                                              | 4.29<br>3.82                    | 64.5            | 4.28<br>3.82        | 67.8            | 4.18<br>3.83   | 67.1                  | 4.19<br>3.85   | 67.3            |                                                                  |                 |                |                                                                                  |  |  |
| CH <sub>3</sub><br>24/23 | 0.68                        | 1.05                            | 13.3                            | 0.79                           | 18.2                                              | 0.69                        | 18.3                            | 0.89                        |                                 | 1.73                                                  | 14.1                            | 1.05                            | 22.9                                                              | 1.10<br>1.17                    | 13.6            | 1.10<br>1.16        | 13.0            | 1.51           | 14.7                  | 1.53           | 14.6            |                                                                  |                 |                |                                                                                  |  |  |
| 25                       | 0.87                        | 0.97                            | 16.1                            | 0.96                           | 15.8                                              | 0.91                        | 16.0                            | 1.05                        |                                 | 1.67                                                  | 16.8                            | 0.97                            | 15.3                                                              | 1.19                            | 15.8            | 1.19                | 15.8            | 1.47           | 17.4                  | 1.48           | 17.3            |                                                                  |                 |                |                                                                                  |  |  |
| 26                       | 1.10                        | 1.04                            | 17.7                            | 1.07                           | 17.5                                              | 0.97                        | 17.7                            | 0.76                        |                                 | 1.63                                                  | 17.9                            | 1.04                            | 16.6                                                              | 1.22                            | 17.5            | 1.22                | 17.5            | 1.42           | 18.6                  | 1.46           | 18.4            |                                                                  |                 |                |                                                                                  |  |  |
| 27                       | 1.10                        | 1.26                            | 26.3                            | 1.23                           | 26.2                                              | 1.19                        | 26.5                            | 1.14                        |                                 | 1.25                                                  | 25.6                            | 1.26                            | 24.5                                                              | 1.29                            | 24.8            | 1.29                | 24.8            | 1.06           | 26.2                  | 1.42           | 24.8            |                                                                  |                 |                |                                                                                  |  |  |
| 29                       | 0.87                        | 0.95                            | 33.4                            | 0.92                           | 33.3                                              | 0.82                        | 33.5                            | 0.89                        | 33.1                            | 0.91                                                  | 32.6                            | 0.95                            | 28.1                                                              | 1.72                            | 28.9            | 1.71                | 28.9            | 0.80           | 33.2                  | 0.99           | 28.8            |                                                                  |                 |                |                                                                                  |  |  |
| 30                       | 0.88                        | 1.02                            | 23.9                            | 1.00                           | 23.8                                              | 0.94                        | 24.0                            | 0.89                        | 23.6                            | 0.99                                                  | 23.1                            | 1.02                            | 24.0                                                              |                                 | 24.8            |                     | 24.8            | 0.72           | 23.7                  | 0.92           | 25.0            |                                                                  |                 |                |                                                                                  |  |  |

[1] Kuo YH, Lin YL, Lee SM. 1988. Scutellaric Acid, a new triterpene from *Scutellaria rivularis*. Chem. Pharm. Bull. 36(9):3619–3622.

[2] Joshi BS, Singh KL, Roy R. 1999. Complete assignments of <sup>1</sup>H and <sup>13</sup>C NMR spectra of the pentacyclic triterpene hederagenin from *Nigella sativa* Linn. Magn Reson Chem. 37(4):295–298.

[3] Morota T. 1995. Triterpenes from *Tripterigium wilfordii*. Phytochemistry. 39(5):1153–1157.

[4] Liu J, Wu Q, Shu J, Zhang R, Liu L. 2020. A novel spermidine macrocyclic alkaloid from the roots of *Tripterigium wilfordii*. Chemistry of Natural Compounds. 56(3):496–499.

[5] Deepak M, Handa SS. 1998. 3 $\alpha$ ,24-Dihydroxy-urs-12-en-28-oic acid from *Verbena officinalis*. Phytochemistry. 49(1):269–271.

[6] Fereda-Miranda R., Delgado G., Vivar AR. 1996. New triterpenoids from *Salvia nicolsoniana*. J Nat Prod. 49(2):225–230.

[7] Fang S, He Z, Fan G, Wu H, Xu J. 1996. Triterpenoids from *Adina rubella*. J Nat Prod. 59(3):304–307.

[8] Ngouela S, Nyasse B, Tsamo E, Sondengam BL, Connolly JD. 1990. Spathodic acid: A triterpene acid from the stem bark of *Spathodea campanulata*. Phytochemistry. 29(12):3959–3961.

[9] Amimoto K, Yoshikawa K, Arihara S. 1993. Triterpenoid saponins of aquifoliaceous plants. XII. Ilexosides XLVI-LI from the leaves of *Ilex rotunda* Thunb. Chem. Pharm. Bull. 41(1):77–80.

[10] Amimoto K, Yoshikawa K, Arihara S. 1992. Triterpenoid saponins of aquifoliaceous plants. VIII. Ilexosides XXIX-XXXII from the leaves of *Ilex rotunda* Thunb. Chem. Pharm. Bull. 40(12):3138–3141.

[11] Khan IA, Sticher O, Rali T. 1993. New Triterpenes from the leaves of *Timonius timon*. J Nat Prod. 56(12):2163–2165.

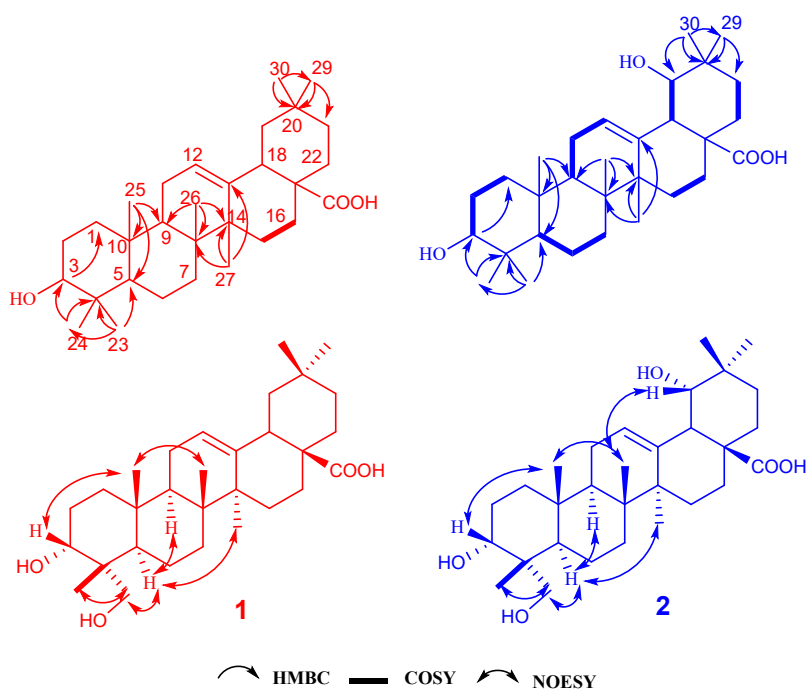

**Figure S1.** Selected HMBC and NOESY correlations of **1** and **2**

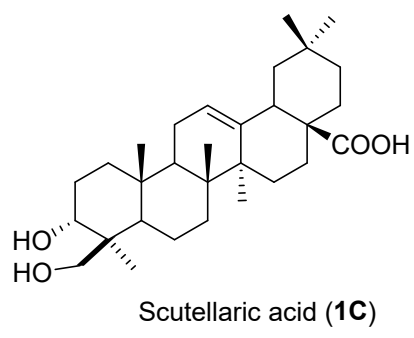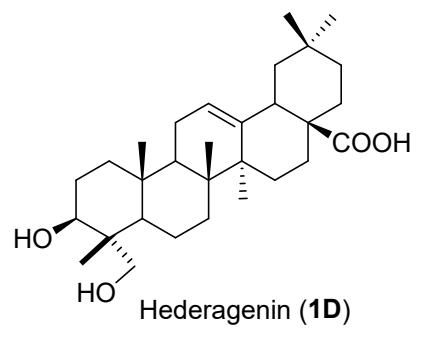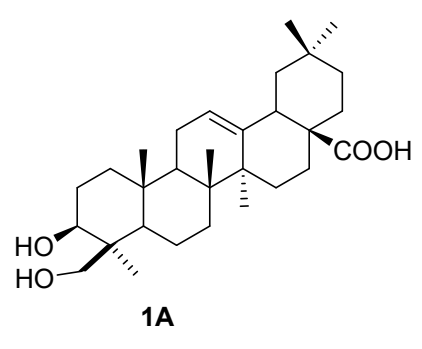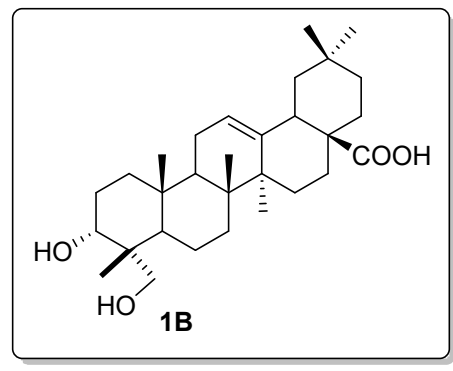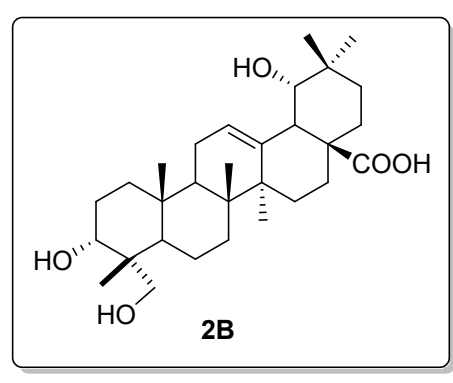

Figure S2. Four possible stereoisomers of 1

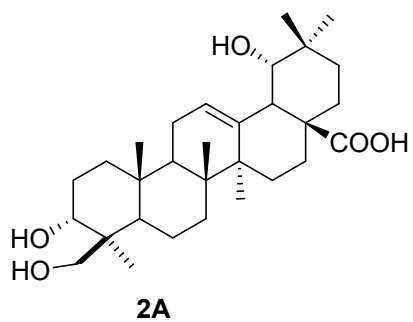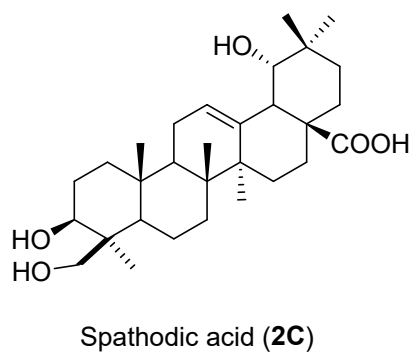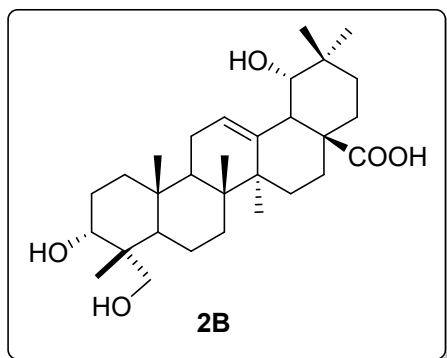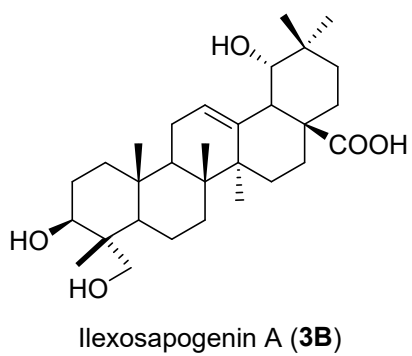

**Figure S3.** Four possible stereoisomers of **2**

Spectrum from TRI\_MR36\_(-)ESI.wiff2 (sample 1) - TRI\_MR36\_(-)ESI, -TOF MS (70 - 1500) from 0.190 min, noise filtered (noise multiplier = 1.5), Gaussian smoothed (0.5 points)

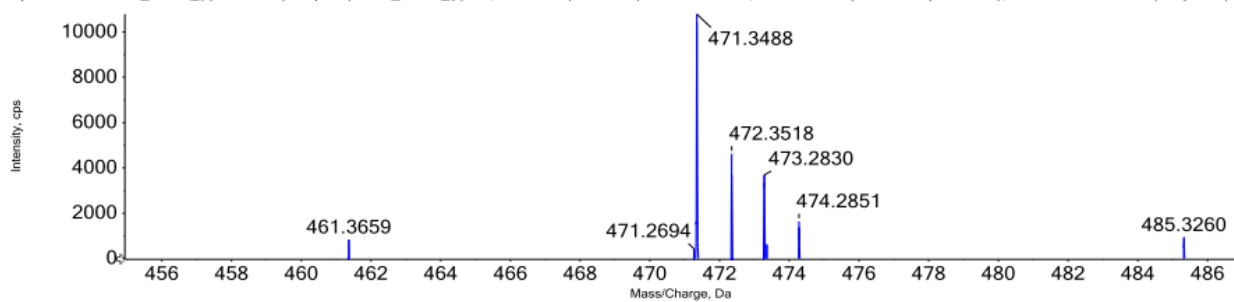

**Figure S4.** HRESIMS spectrum of **1**.

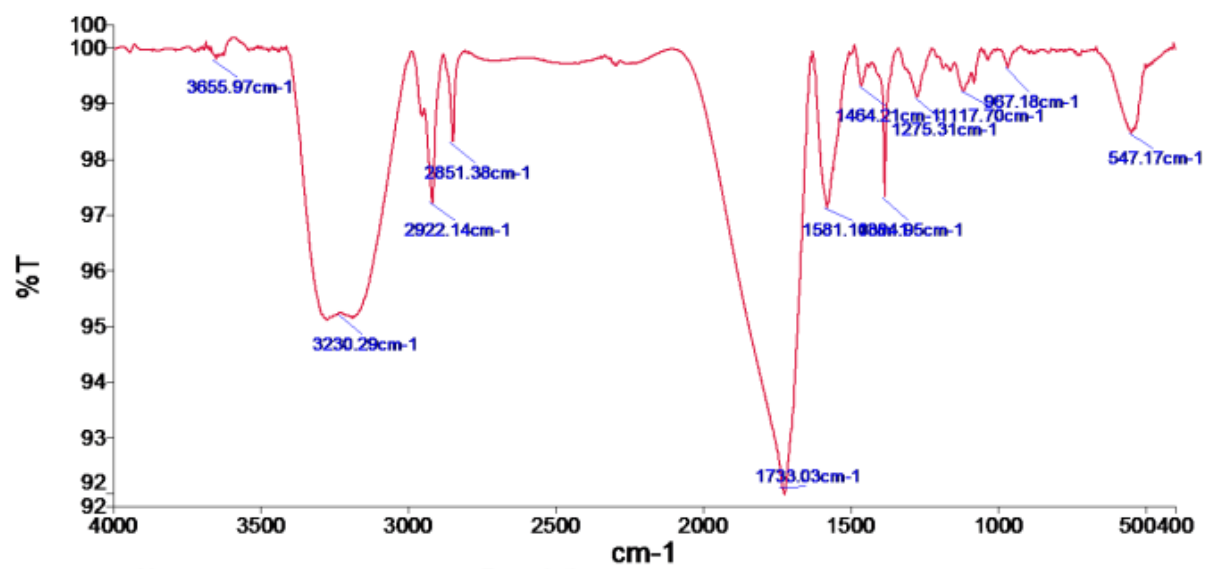

Figure S5. IR spectrum of 1.



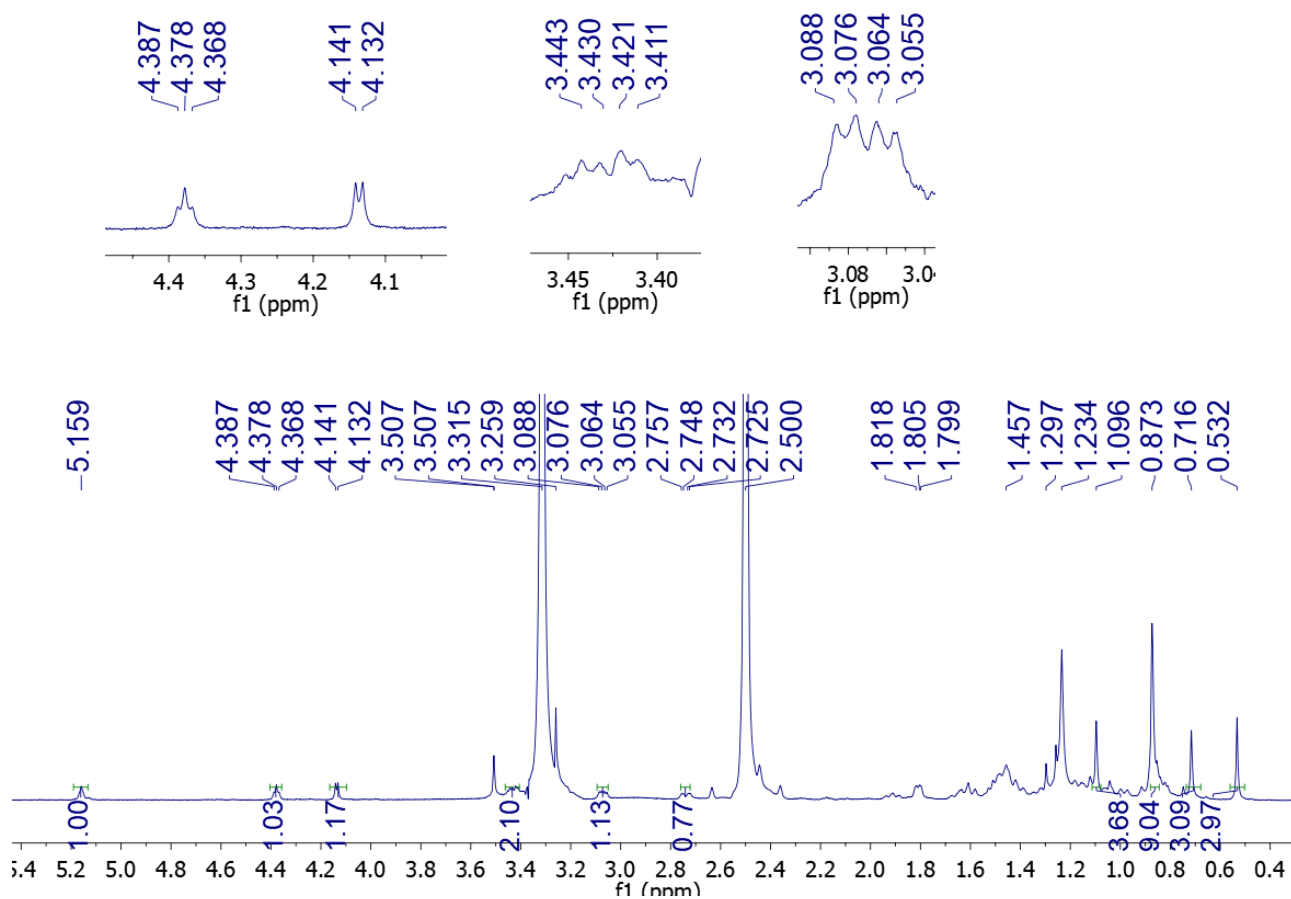

**Figure S6.** The  $^1\text{H-NMR}$  ( $\text{DMSO-}d_6$ , 500 MHz) spectrum of **1**.

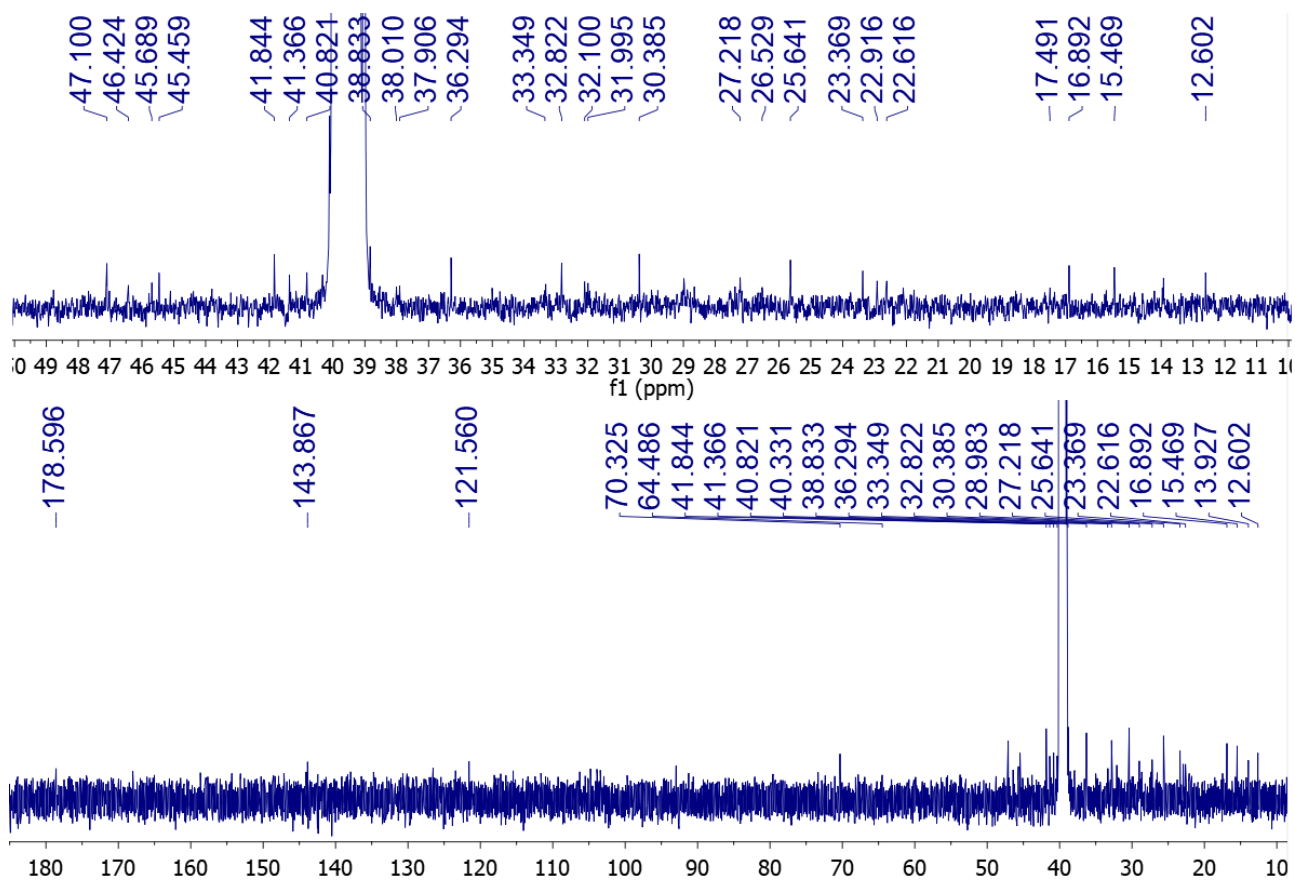

**Figure S7.** The  $^{13}\text{C}$ -NMR ( $\text{DMSO-}d_6$ , 500 MHz) spectrum of **1**.

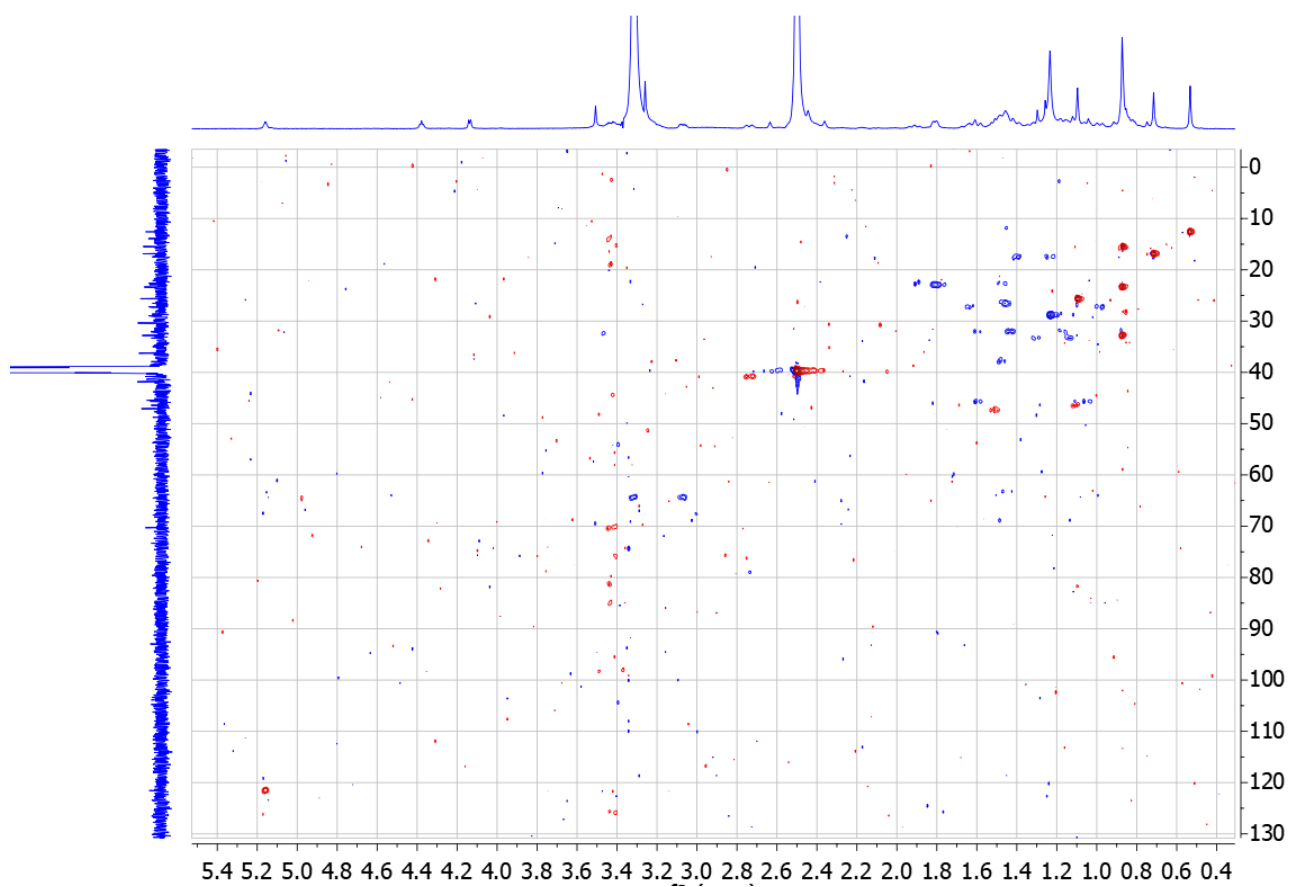

**Figure S8.** The HSQC (DMSO-*d*<sub>6</sub>) spectrum of **1**

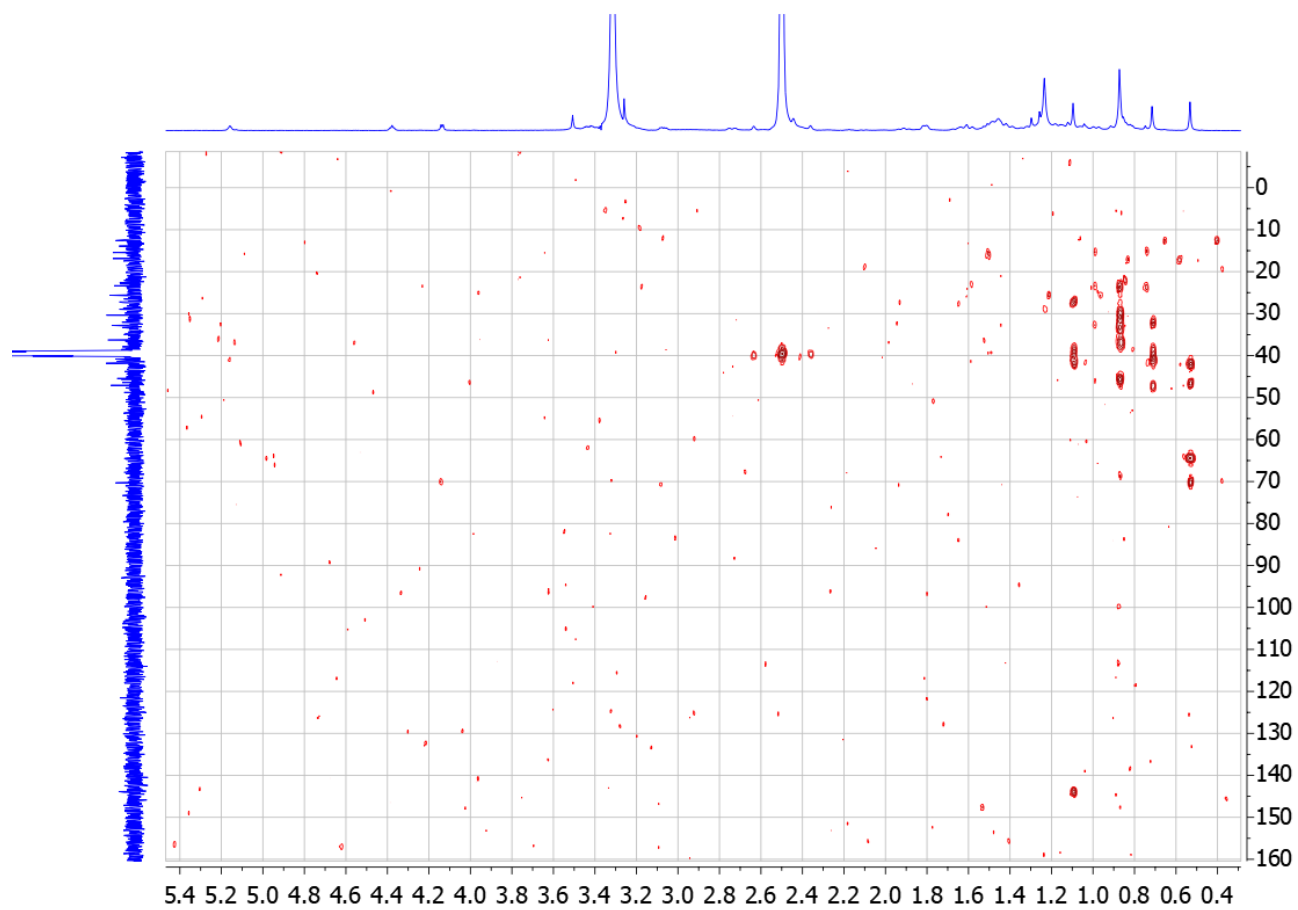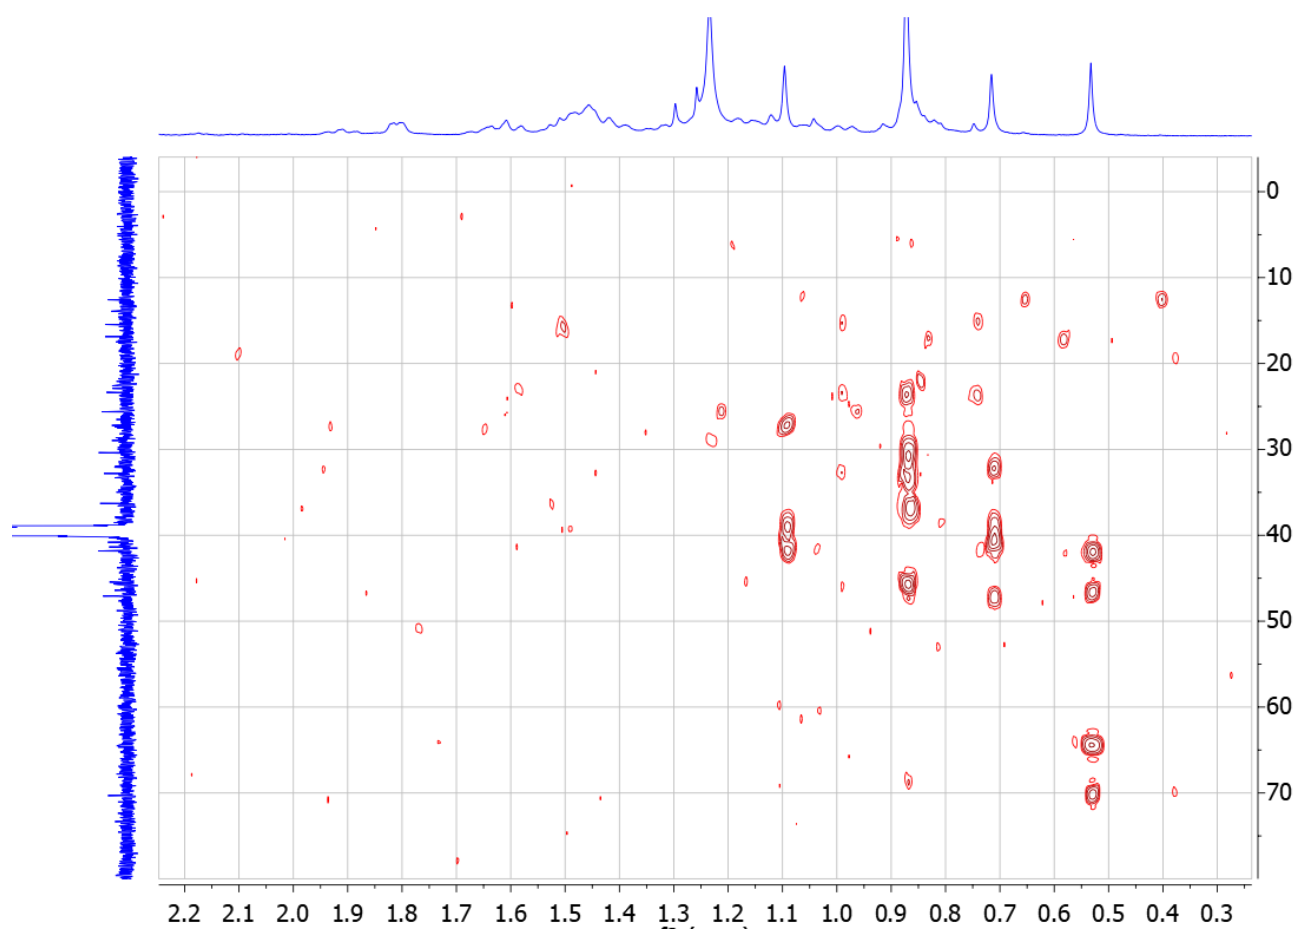

Figure S9. The HMBC ( $\text{DMSO-}d_6$ ) spectrum of **1**.

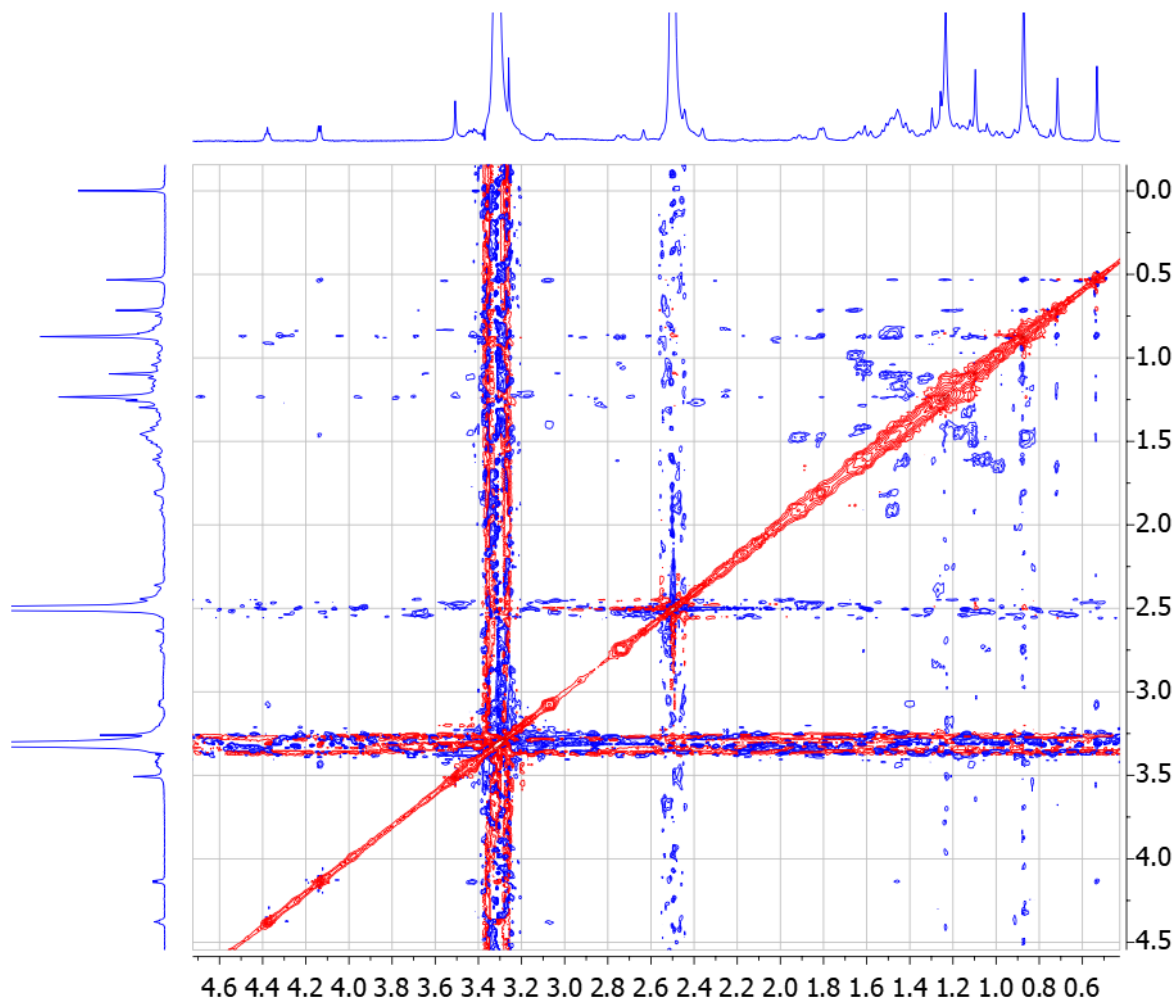

**Figure S10.** The NOESY (DMSO-*d*<sub>6</sub>) spectrum of **1**.

### Expanded spectrum

Spectrum from TRI\_MR25\_(-)ESI.wiff2 (sample 1) - TRI\_MR25\_(-)ESI, -TOF MS (70 - 1500) from 0.176 min, noise filtered (noise multiplier = 1.5), Gaussian smoothed (0.5 points)

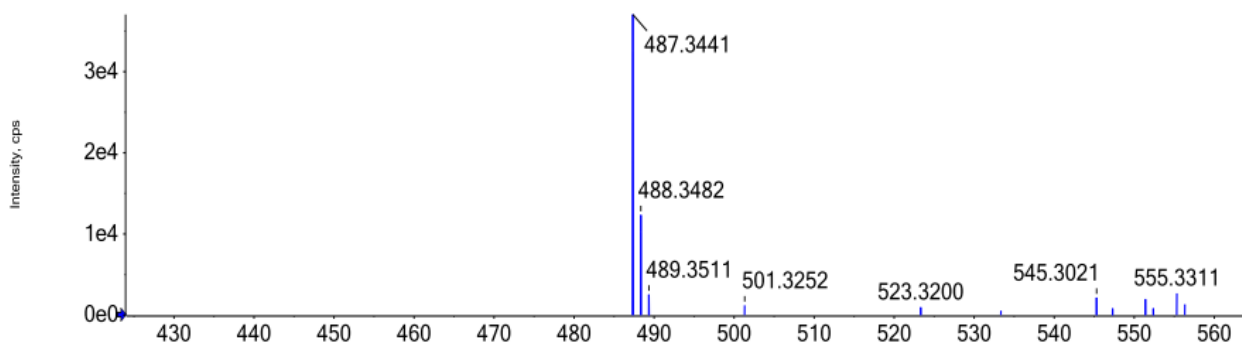

**Figure S11.** HRESIMS spectrum of **2**.

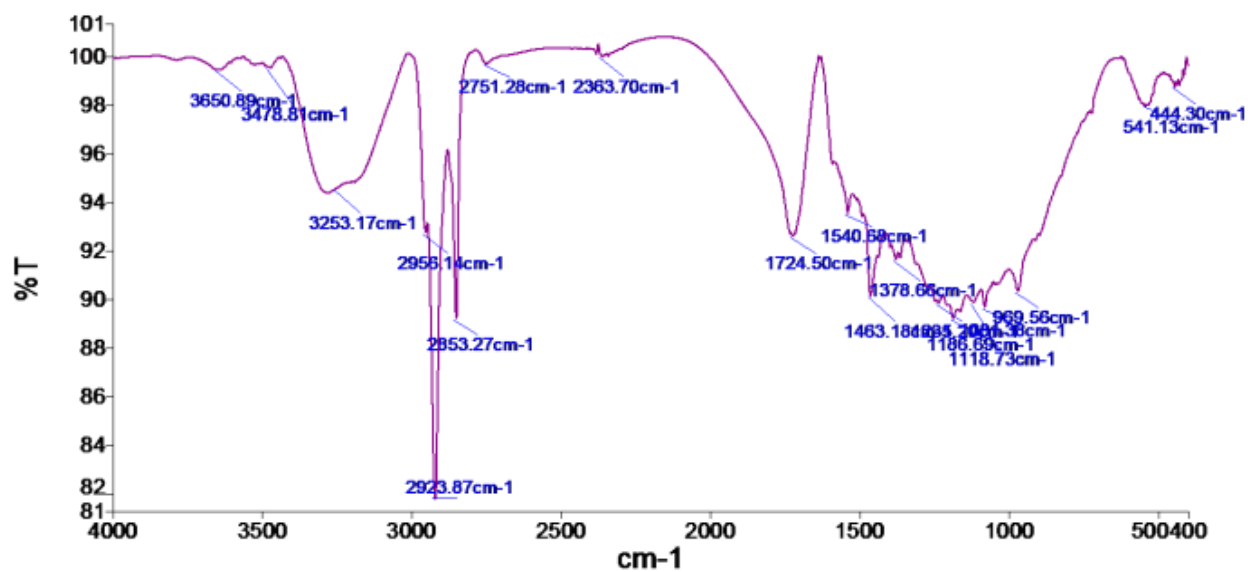

Figure S12. IR spectrum of 2.

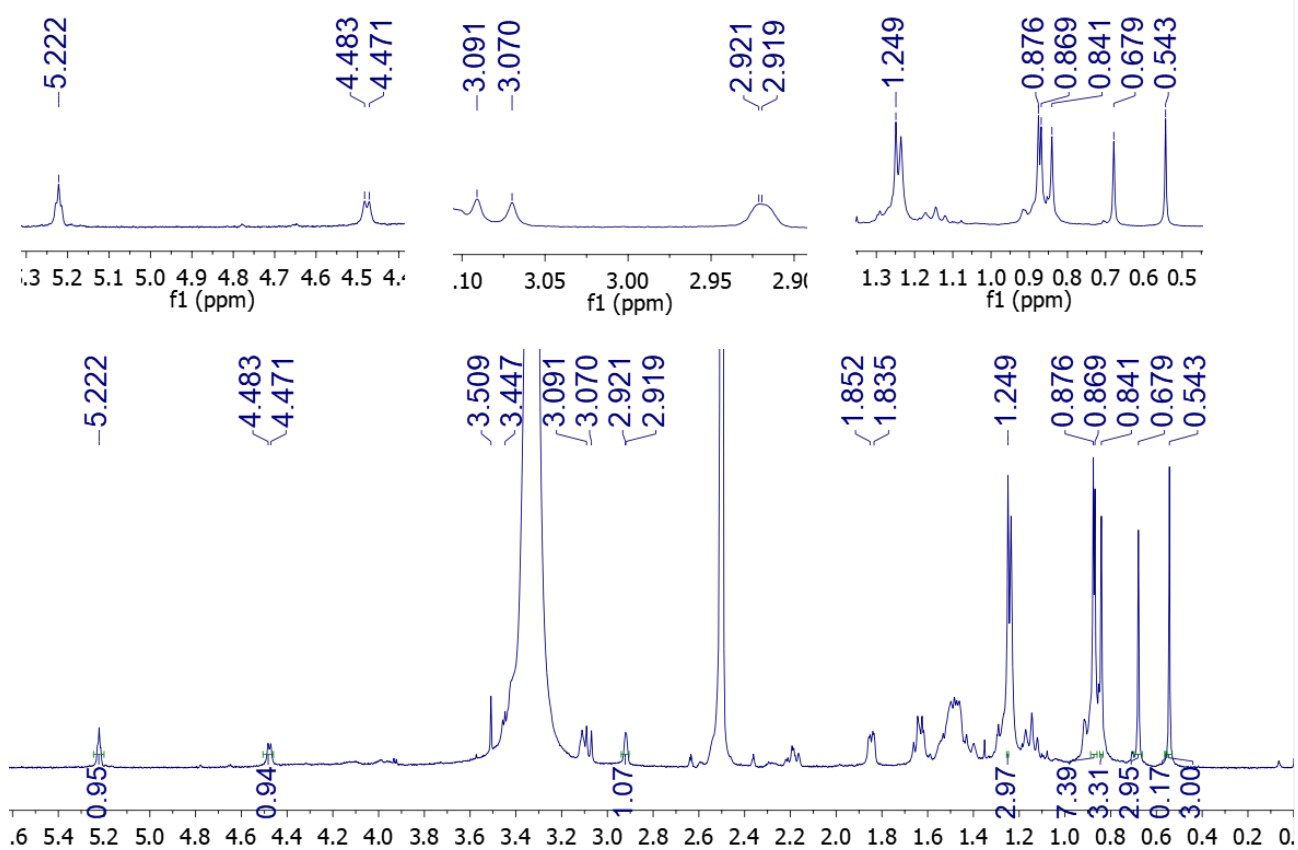

**Figure S13.** The  $^1\text{H-NMR}$  ( $\text{DMSO-}d_6$ , 500 MHz) spectrum of **2**.



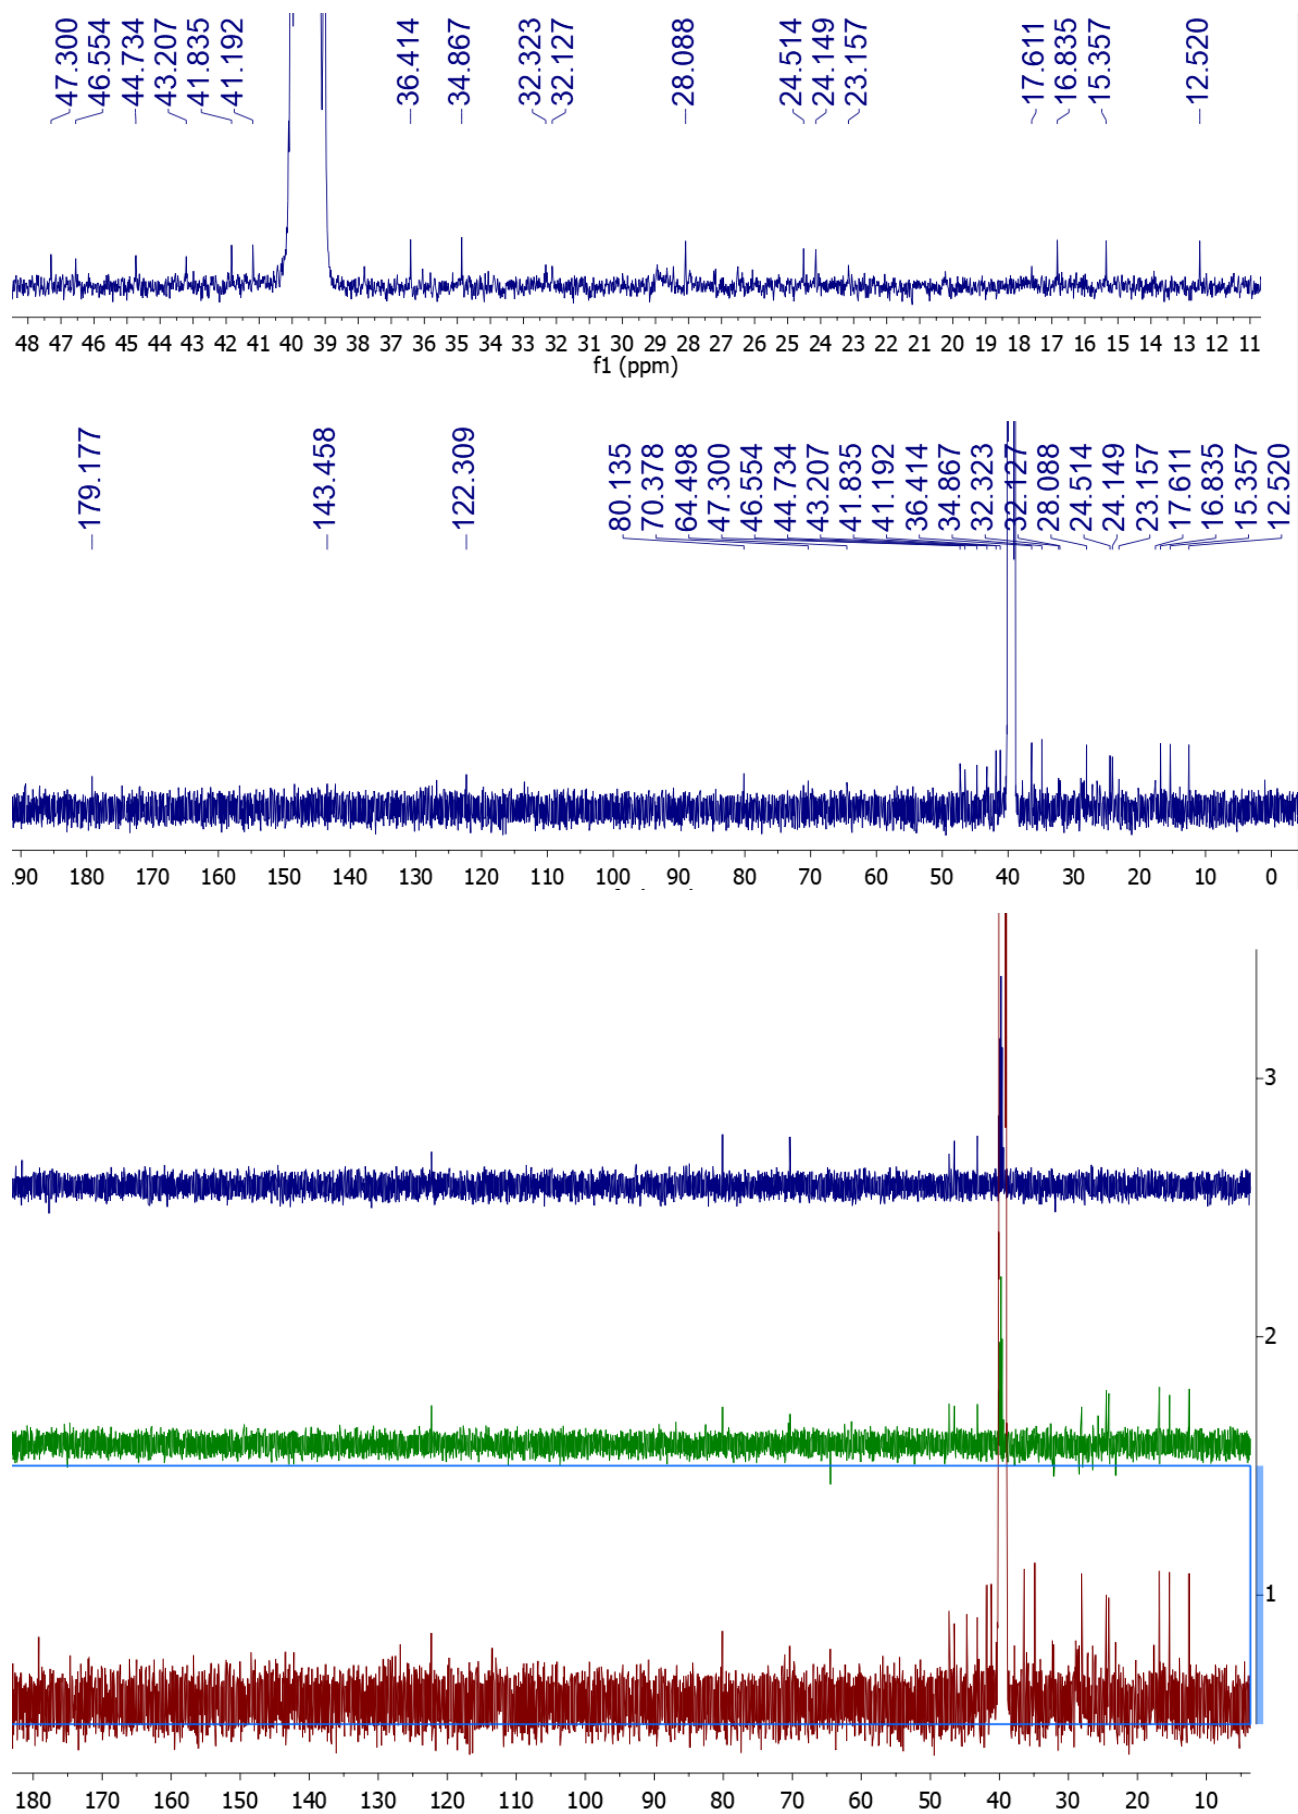

**Figure S14.** The <sup>13</sup>C-NMR (DMSO-*d*<sub>6</sub>, 500 MHz) spectrum of **2**.

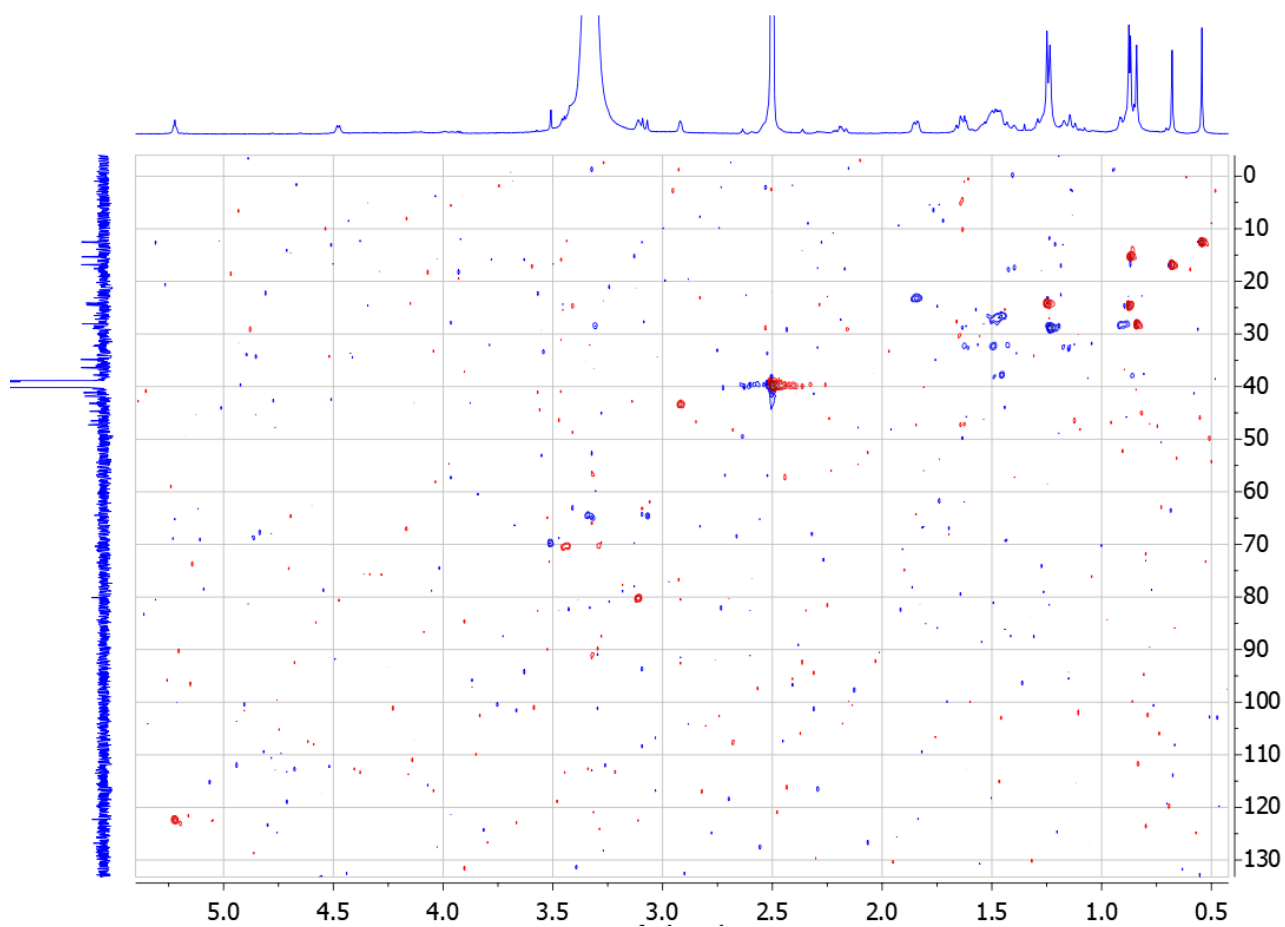

**Figure S15.** The HSQC (DMSO- $d_6$ ) spectrum of **2**

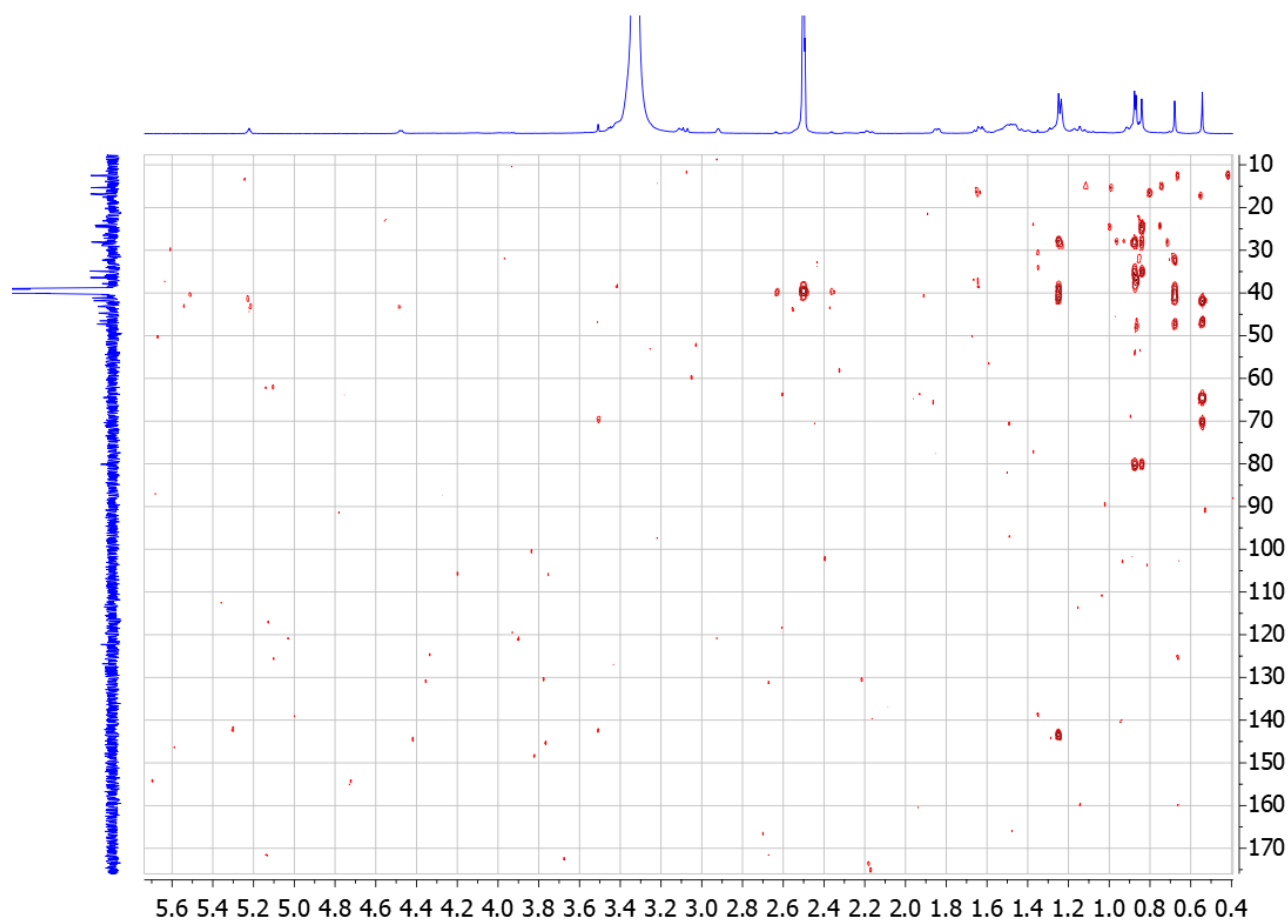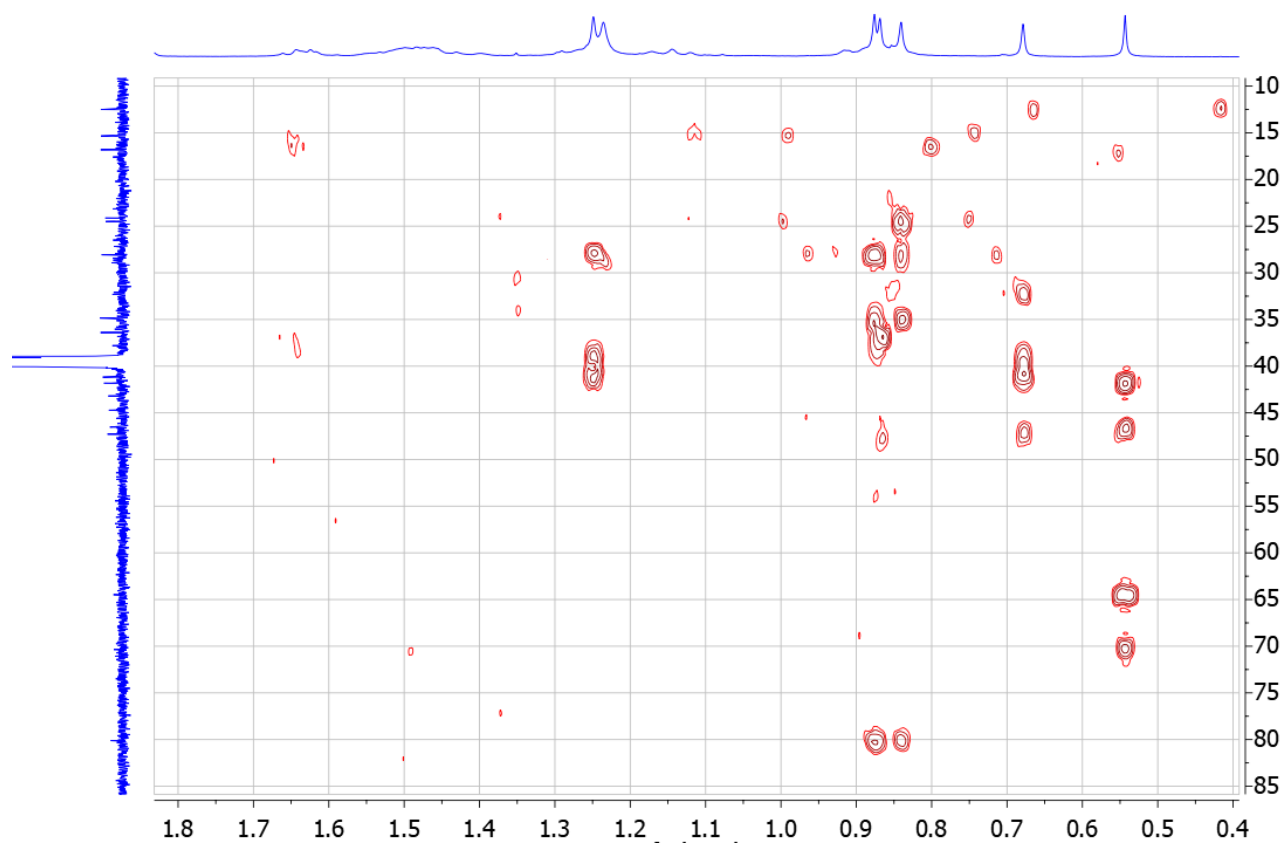

Figure S16. The HMBC (DMSO- $d_6$ ) spectrum of **2**.

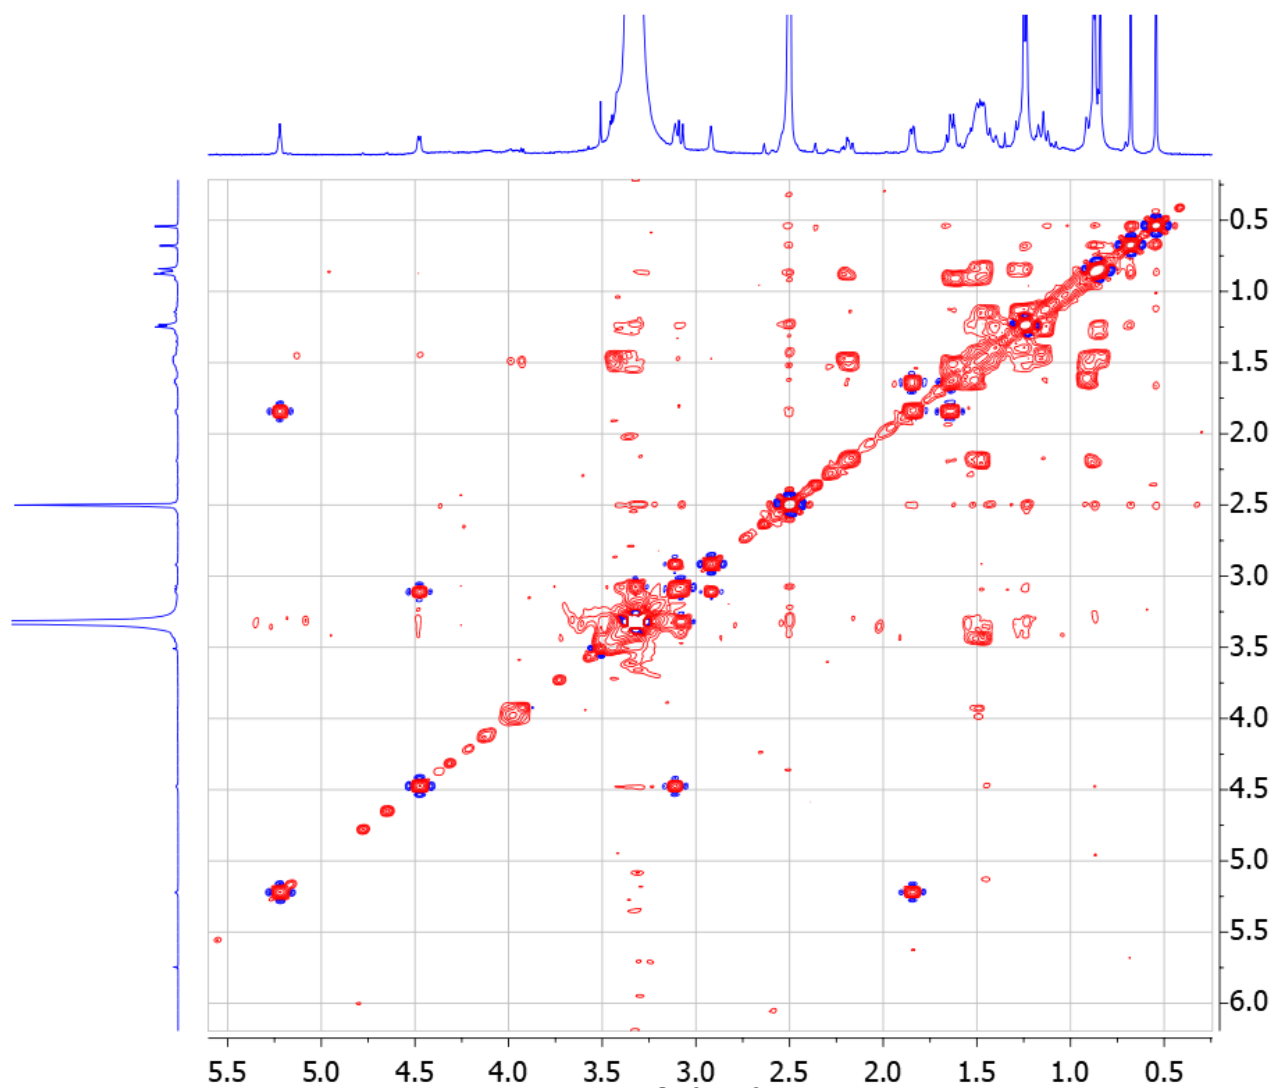

**Figure S17.** The COSY (DMSO- $d_6$ ) spectrum of **2**.

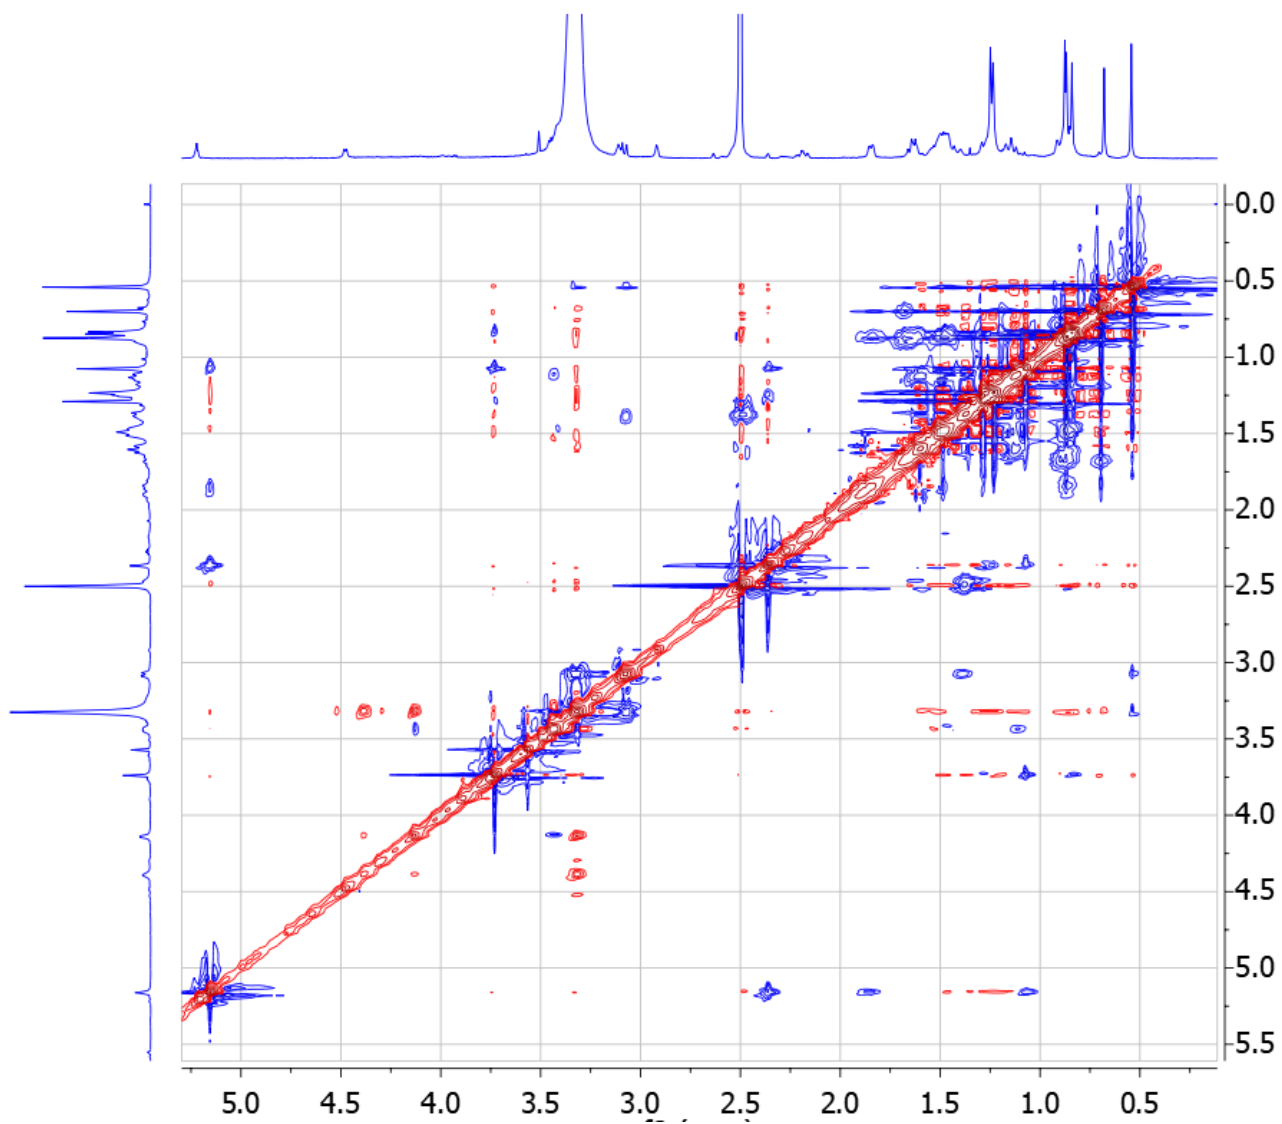

**Figure S18.** The NOESY (DMSO- $d_6$ ) spectrum of **2**.

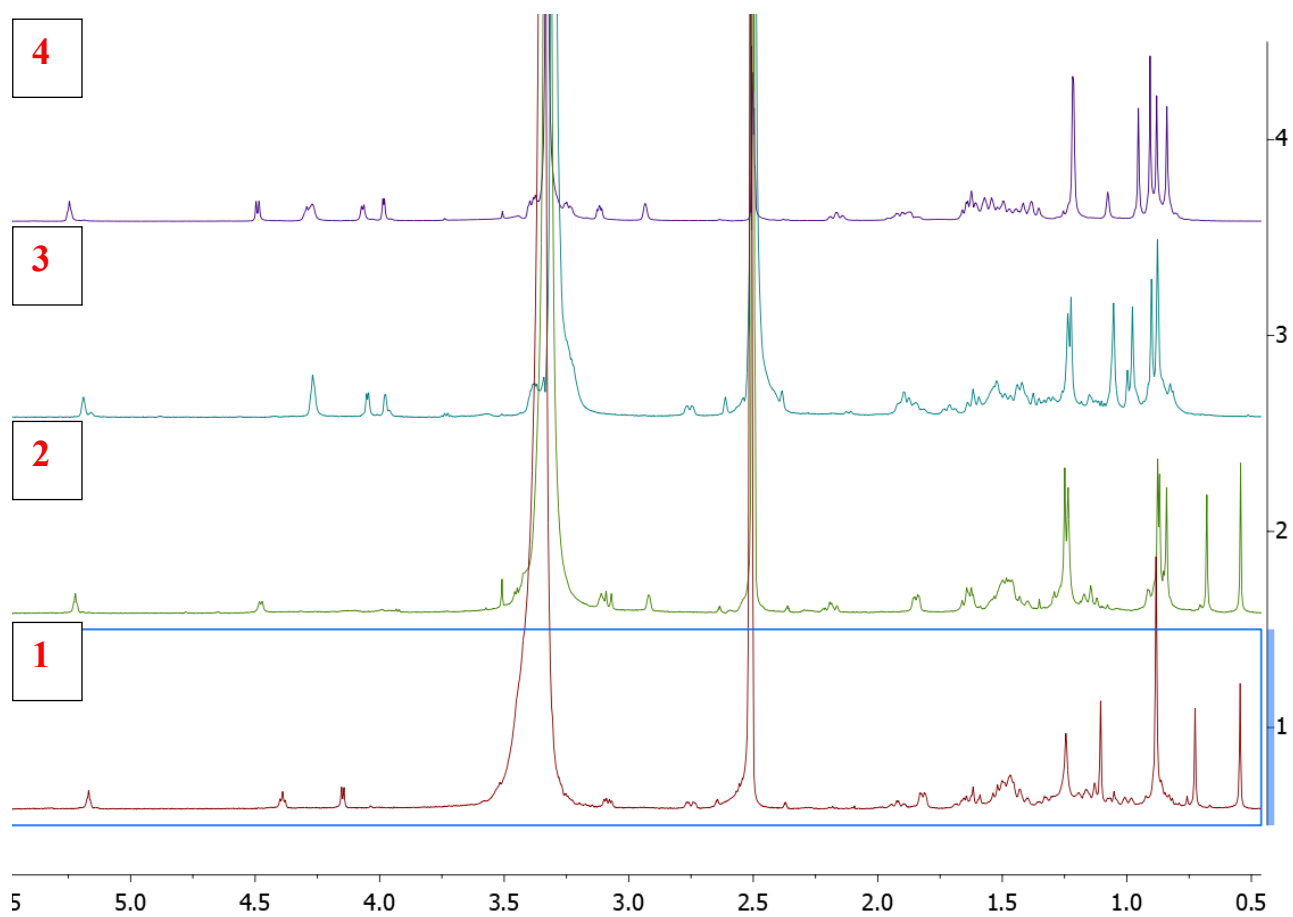

**Figure S19.** Comparison of  $^1\text{H-NMR}$  spectra of **1-4**.

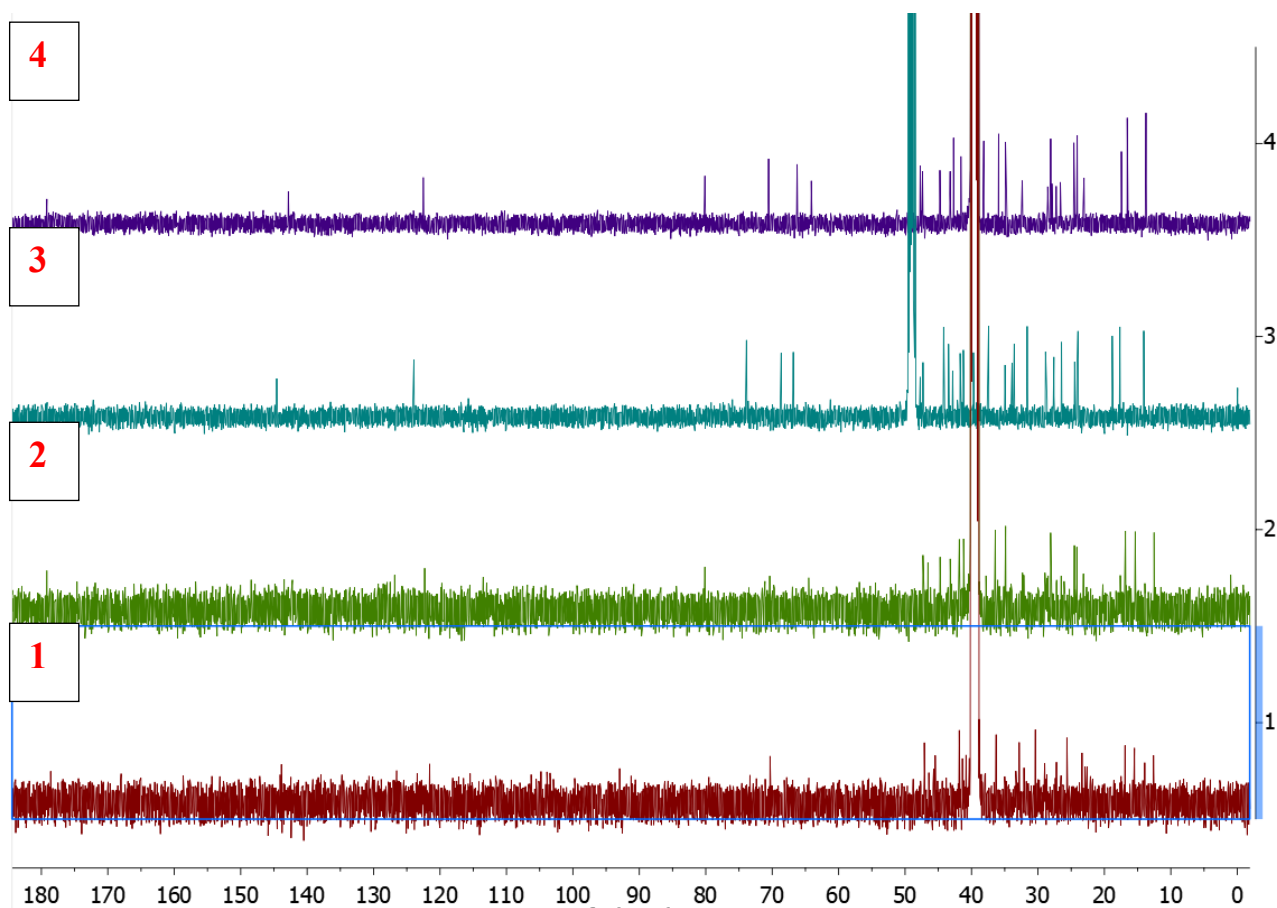

**Figure S20.** Comparison of  $^{13}\text{C}$ -NMR spectra of 1-4.

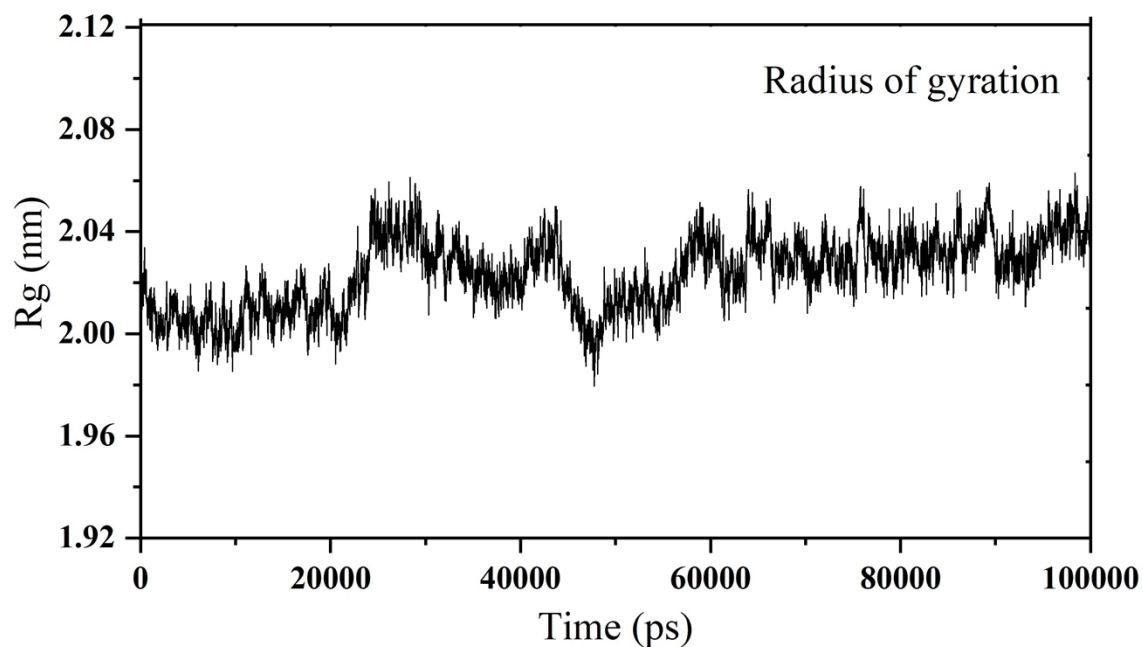

**Figure S21.** The radius of gyration of the protein-best pose was calculated using 100-ns MD simulations.

Table S3. Biological activity of tested compounds on the NO inhibitory activity

| Concentration (µg/mL) | 1               |            | 2               |            | 3               |            | 4               |            | L-NMMA          |            |
|-----------------------|-----------------|------------|-----------------|------------|-----------------|------------|-----------------|------------|-----------------|------------|
|                       | % NO inhibition | % Survival |
| 100                   | 46.81           | 97.86      | 67.58           | 44.74      | 86.01           | 15.48      | 44.51           | 103.77     | 95.60           | 82.20      |
| 20                    | 35.66           | 103.48     | 44.51           | 97.24      | 40.66           | 96.08      | 27.47           | 106.02     | 75.38           | 93.10      |
| 4                     | 4.69            |            | 36.26           |            | 21.43           |            | 12.09           |            | 19.34           |            |
| 0.8                   | -8.83           |            | 23.08           |            | 6.59            |            | 7.69            |            | 12.77           |            |
| IC <sub>50</sub>      | >100            | -          | 27.15±1.23      | -          | 29.39±1.55      | -          | >100            | -          | 10.24±1.65      | -          |

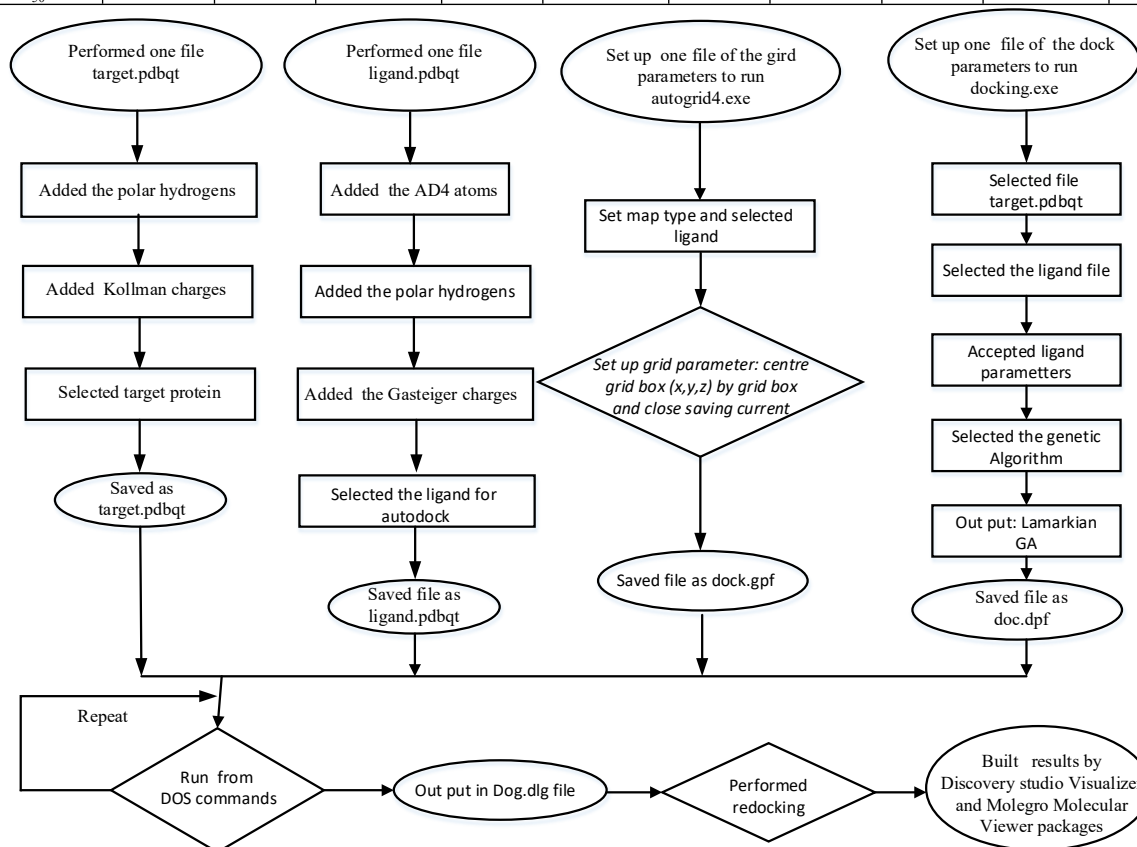

**Scheme S1.** Procedure docking of ligand to receptor based on autodock
